# Supplementary material
Source: PubMed Central journal article supplement (PMC8126863)
Supplement: pnas.2101989118.sapp.pdf [file pnas.2101989118.sapp.pdf]

1 **Supplemental Information:**

2

3

4

5

6

7 **Cleavage of Braun's lipoprotein Lpp from the bacterial peptidoglycan by a paralog of**

8 **L,D-transpeptidases, LdtF**

9

10

11

12 Raj Bahadur, Pavan Kumar Chodiseti, and Manjula Reddy\*

13 CSIR-Centre for Cellular and Molecular Biology

14 Hyderabad India 500007

15

16

17

18

19

20

## 21 **Supporting Materials and Methods**

### 22 **Plasmid constructions**

23 For PCR amplifications, genomic DNA of MG1655 strain was used as a template unless  
24 otherwise indicated. Amplification of DNA for cloning purposes was done using Phusion  
25 DNA polymerase (NEB) and clones obtained were confirmed by sequence analysis.

26 **pRB1.** The *ldtF* gene along with its native ribosome binding site (RBS) was PCR amplified  
27 using forward and reverse primers 5'-GCTCTAGAAGGAATAAGCAGTATGCGTAAA-3'  
28 and 5'-CCCAAGCTTTTATTTTGCCTCGGGGAGCGTGT-3' respectively and the resulting  
29 amplified DNA fragment was cloned using XbaI and HindIII sites (underlined in the primer  
30 sequence) in a cloning vector, pTrc99a to obtain pRB1. The clones were confirmed by  
31 sequence analysis and shown to suppress the NA-sensitivity of  $\Delta mepS$  mutant at 37°C with  
32 250  $\mu$ M IPTG.

33 **pRB2 and pRB3.** To create site directed variants of *ldtF* (H135A and C143A), a 3 step PCR  
34 was performed. For this procedure, two primers were synthesized that are complementary to  
35 each other with desired mutations at the center (in bold and underlined). In the first PCR step,  
36 N-terminal fragment of *ldtF* gene was amplified using a common forward primer and a  
37 reverse primer containing the desired mismatch. In the second PCR step, C-terminal fragment  
38 of *ldtF* gene was amplified using a forward primer containing the desired mismatch and a  
39 common reverse primer. Desired mismatches code for an alanine instead of H135, and C143  
40 in the LdtF. Common forward primer (containing its native RBS and an XbaI site), and  
41 reverse primer (containing a HindIII site) are used for cloning these variants.

42 Common forward primer: 5'-GCTCTAGAAGGAATAAGCAGTATGCGTAAA-3' and

43 Reverse primer: 5'-CCCAAGCTTTTATTTTGCCTCGGGGAGCGTGT-3'.

44 The forward and reverse primers with nucleotide substitution are:

45 Histidine to alanine change at codon 135-

46 5'-AAGGGAAATACCTGATGATCGCTGGCGATTGTGTTTCCATCGG-3' and

47 5'-CCGATGGAAACACAATCGCCAGCGATCATCAGGTATTTCCCTT-3'

48 Cysteine to alanine change at codon 143-

49 5'-GCGATTGTGTTTCCATCGGCGCTTACGCAATGACCAATCAGGG-3' and

50 5'- CCCTGATTGGTCATTGCGTAAGCGCCGATGGAAACACAATCGC-3'

51 In the third step, both the PCR products were mixed in 1:1 molar ratio and end filling was  
52 done by PCR in 10 cycles at low annealing temperature. After addition of common forward  
53 and reverse primer, PCR was resumed for the next 30 cycles. The final PCR product was  
54 digested with XbaI-HindIII and cloned into pTrc99a digested with the same enzymes. The  
55 recombinant plasmids, pRB2 (*ldtF*-H135A) and pRB3 (*ldtF*-C143A) were confirmed for the  
56 presence of mutations by sequencing.

57 **pRB4.** A fragment encoding  $LdtF^{20-246}$  was cloned into pET21b vector in between NdeI and  
58 XhoI sites using forward and reverse primers

59 5'-GGAATTCCATATGGGTTTGCTGGGCAGCAGTAG-3 and

60 5'-CCGCTCGAGTTTTGCCTCGGGGAGCGTG TAG-3' respectively to generate a C-  
61 terminal 6XHis fusion vector. The plasmid was confirmed by sequencing and used for  
62 expression and purification of LdtF.

63 **Construction of an *ldtF* deletion mutation ( $\Delta 149ldtF::Kan$ )**

64 We constructed a partial deletion mutant of *ldtF* lacking N-terminal 1-149 amino acids using  
65 recombineering as described earlier (1). The hybrid primers used for constructing this  
66 deletion are:

67 FP: 5'-

68 GTCCTGGCGTGTGTAACCGTTTTATCAAGGAATAAGCAGTATGTGTAGGCTGGAG  
69 CTGCTTC-3'

70 RP: 5'-

71 CACCAGCGCACCAGTAACGAACTGGAATATCTCATCAATACCATATGAATATCCT  
72 CCTTAG-3'

73 In the first step, the Kan<sup>R</sup> cassette of pKD4 vector (1) was amplified with above set of  
74 primers and the purified PCR product was electroporated into a strain encoding  $\lambda$  Red-Gam  
75 system. Transformants were selected on plates supplemented with 25  $\mu$ g/ml kanamycin,  
76 followed by confirming the deletion by sequencing and linkage analysis. The deletion was  
77 subsequently transferred by P1 transduction into MG1655. This deletion mutant behaved  
78 exactly like that of the deletion mutant of Keio collection (in terms of causing sickness to  
79 *mepS mepK* double mutant and in PG composition) and hence, Keio deletion mutation was  
80 used throughout the study.

### 81 **Construction of *ldtF*-FLAG fusion**

82 Epitope tagging of LdtF using a 3xFlag was done at the 3' end of the gene at its native  
83 chromosomal locus by recombineering as described earlier (2). The sequence of the hybrid  
84 primers used for construction of this fusion is given below:

85 FP: 5'-  
86 GCAGCCACAACCTGGCATCAAACCTACACGCTCCCCGAGGCAAAAGACTACAAAGA  
87 CCATGACGGTG-3' and,  
88 RP: 5'-  
89 CGGGCAATGAAACCTGGCAAAAGATTATGCCAGGCGAATGGCGCCATATGAATA  
90 TCCTCCTTAG-3'

91 The 3xFlag tag along with Kan<sup>R</sup> cassette was amplified from plasmid pSUB11 (2) using the  
92 above primers. The 5' end of (43 bases) forward primer has homology to the C-terminal of  
93 *ldtF* without stop a codon whereas the 3' end (22 bases) has homology to the region encoding  
94 Flag epitope of pSUB11. Similarly, the 5' end of reverse primer has a region homologous (42  
95 bases) to the downstream sequence of *ldtF* whereas the 3' end has a region (22 bases) which  
96 has homology to the sequence of pSUB11 plasmid at the 3' end. The PCR product was  
97 electroporated into DY378 and transformants were selected on plates supplemented with 25  
98 µg/ml Kanamycin at 30°C on LB. The putative *ldtF*-3xFlag-Kan<sup>R</sup> region was transferred into  
99 MG1655 by P1 transduction and the construct was confirmed by sequencing and linkage  
100 analysis. The expression of the fusion tag was confirmed by western blotting using anti-  
101 FLAG antibodies.

#### 102 **Confirmation of deletion mutation (mutant from Keio collection) of *ldtF***

103 The Keio deletion mutant of *ldtF* (3) was confirmed by sequencing the gene-Kan<sup>R</sup> junctions.  
104 The region encompassing the deletion mutation was amplified using the below primers and  
105 sequenced using the same primers.

106 FP: 5'- GACAGGCTTGCGTAAACTC-3 and,  
107 RP: 5'- CAGGATGTGGAAATCGACTTCAGC-3

108 **Detailed methods:**

109 **Viability assays and Microscopy.** Viability of the indicated strains was examined by  
110 growing cultures overnight, serially diluting ( $10^{-2}$ ,  $10^{-4}$ ,  $10^{-5}$  and  $10^{-6}$ ), and placing 3-5  $\mu$ l  
111 aliquots of each dilution onto the required plates. Plates were normally incubated for 18-24 h  
112 at the indicated temperature. To measure growth rates, overnight grown cultures were diluted  
113 1:100 into fresh medium, allowed to grow and OD at 600 nm was determined after every 1 h  
114 interval and data were plotted using Origin software. For microscopy, immobilized cultures  
115 on a thin 1% agarose pad were visualized using Zeiss AxioImager.Z2 microscope by DIC.

116 **Purification of LdtF**

117 LdtF encoding plasmid, pET21b-*ldtF*<sup>20-246</sup> (pRB4) was introduced into BL21 ( $\lambda$ DE3) strain  
118 and transformants were selected on LB plates supplemented with ampicillin (Amp). One  
119 purified colony was grown overnight and used to dilute 1:100 into 50 ml fresh LB broth  
120 containing Amp. Culture was induced with 250  $\mu$ M IPTG at 0.6 OD and further allowed to  
121 grow for 2 h at 37°C. Cells were harvested, and pellet was stored at -30°C. When required,  
122 pellet was resuspended in 1 ml of buffer (50 mM Tris-Cl, 300 mM NaCl and 20 mM  
123 imidazole, pH 8.0) and lysed by sonication. Cell debris was removed by centrifugation and  
124 the supernatant was mixed with 200  $\mu$ l Ni<sup>2+</sup>-NTA agarose (Qiagen) and mixed for 1 h at 4°C.  
125 This mixture was loaded onto pre-washed empty column (Bio-Rad) and washed with 30 ml  
126 wash buffer-1 (50 mM Tris, 300 NaCl, 30 mM imidazole, pH 8.0) and 20 ml of wash buffer-  
127 2 (50 mM Tris, 300 NaCl, 50 mM imidazole, pH 8.0). The bound proteins were eluted with 5  
128 ml of elution buffer (50 mM Tris, 300 NaCl, 150 mM imidazole, pH 8.0) and concentrated to  
129 2.5 ml using a 3 kDa cut-off centrifugal membrane filter (Millipore). This was then loaded  
130 onto a buffer exchange PD-10 column and protein was eluted into 3.5 ml 2 x storage buffer  
131 (100 mM Tris, 200 mM NaCl, 2 mM DTT). The fraction was further concentrated to 250  $\mu$ l

132 using 3 kDa cut-off centrifugal membrane filter and mixed with equal volume of 100%  
133 glycerol and stored at  $-30^{\circ}\text{C}$ .

134 **Preparation of PG sacculi.** Isolation of PG was done as described earlier (4,5). Cells grown  
135 to  $A_{600}$  of 1.0 were collected by centrifugation at  $10,000\times g$  for 10 min at  $4^{\circ}\text{C}$ . Cell pellet  
136 (from 1000 ml) was resuspended in 6 ml of ice-cold deionized water and added drop wise  
137 into 6 ml of boiling 8% SDS with vigorous stirring followed by boiling for another 45 min to  
138 solubilize membranes and to destroy high molecular weight DNA. After overnight incubation  
139 at room temperature, the PG sacculi were collected by high speed centrifugation ( $200,000\times g$ ,  
140 40 min) and washed thoroughly with deionized water to completely remove SDS. High  
141 molecular weight glycogen and covalently bound lipoprotein, Lpp were removed by treating  
142 with  $\alpha$ -amylase (100  $\mu\text{g/ml}$  in 10 mM Tris-HCl, pH 7.0, 2 h at  $37^{\circ}\text{C}$ ) and pre-digested  
143 pronase (200  $\mu\text{g/ml}$ , 90 min at  $60^{\circ}\text{C}$ ). Enzymes were inactivated by boiling with equal  
144 volume of 8% SDS for 15 min and pure sacculi were obtained by ultracentrifugation and  
145 washed several times with water till SDS was completely removed. Final pellet was  
146 resuspended in 0.5 ml of 25 mM Tris-HCl (pH 8.0) and stored at  $-30^{\circ}\text{C}$ .

147 Lpp-bound PG sacculi were prepared from cultures grown up to  $A_{600}$  of  $\sim 6.0$  using the above-  
148 described protocol except that the treatment with Pronase was not done.

149 **Analysis of PG sacculi.** PG analysis was done as previously described (4,5). Essentially, the  
150 sacculi were digested with 10 U mutanolysin (Sigma-Aldrich) at  $37^{\circ}\text{C}$  in 25 mM Tris-HCl  
151 (pH 8.0) for 16 h and soluble mucopeptides were collected after centrifugation. This fraction  
152 was reduced with 1 mg of sodium borohydride in 50 mM sodium borate buffer (pH 9.0) for  
153 30 min and excess borohydride was destroyed by addition of 20% phosphoric acid. pH was  
154 adjusted to 3–4 and samples were loaded onto a reverse phase C18 column (Zorbax 300 SB;  
155  $250\times 4.6$  mm, 5 mm) connected to Agilent technologies RRLC 1200 system. Column

156 temperature was 55°C and binding was done at a flow rate of 0.5 ml/min with 1% acetonitrile  
157 in water containing 0.1% trifluoroacetic acid (TFA) for 10 min. Muropeptides were eluted in  
158 a gradient of 1–10% acetonitrile containing 0.1% TFA at a flow rate of 0.5 ml/min for next  
159 60 min (using RRLC online software called Chemstation). Absorbance of muropeptides was  
160 detected at 205 nm.

161 **Mass spectrometry (MS) analysis of muropeptides.** Muropeptide fractions collected during  
162 HPLC were dried and reconstituted into 5% acetonitrile with 0.1% formic acid and loaded  
163 onto a reverse phase PepMap<sup>TM</sup> RSLC - C18 column (3 μm, 100Å, 75μmx, 15cm) connected  
164 to Q-Exactive<sup>TM</sup> HF Hybrid Quadrupole-Orbitrap<sup>TM</sup> Mass Spectrometer (Thermo Fisher  
165 Scientific, USA). Peaks were analysed by tandem MS and structures were decoded based on  
166 molecular mass of the individual fragments.

#### 167 **Determination of Lpp-bound muropeptides**

168 Normalized muropeptides were boiled with Laemmli loading dye and separated using 15%  
169 SDS-PAGE. Lpp was detected by western blot using rabbit anti-Lpp antibody. As a positive  
170 control (free form of Lpp) cell lysates of WT,  $\Delta ldtF$ , or  $\Delta ldtABC$  (equivalent of 0.012 OD)  
171 were used.

#### 172 **Cleavage of Lpp from intact PG sacculi**

173 Lpp-bound PG sacculi were isolated from WT and  $\Delta ldtF$  (grown upto ~6 OD) without  
174 pronase treatment as described. Equal volumes of the PG sacculi were treated with buffer,  
175 pronase (as positive control) or LdtF (4 μM) for 16 h at 30°C. Reaction was stopped by heat  
176 inactivation and supernatant was collected after centrifugation at 15000xg for 15 min. These  
177 fractions were run on 15% SDS-PAGE to detect the Lpp released from intact PG sacculi. The



178 remaining pellet fraction was further digested with mutanolysin and the resulting soluble  
179 mucopeptides were separated by RP-HPLC.

180

Fig. S1

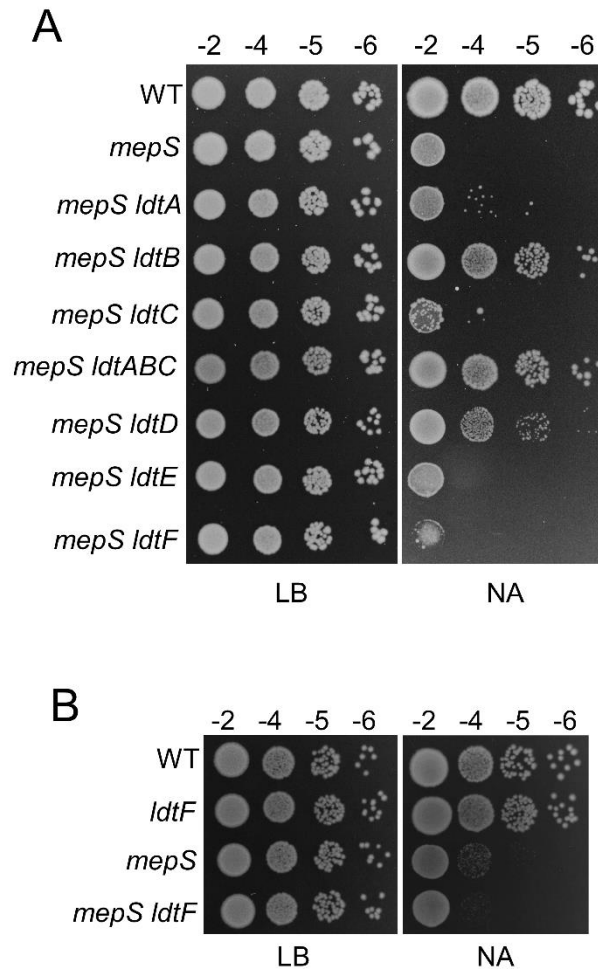

184 **Fig. S1.** Genetic interactions of *mepS* with *ldts*. A. WT (MG1655) and its deletion mutant  
185 derivatives were grown overnight in LB broth, serially diluted, and 5 µL of each dilution  
186 were spotted on indicated plates and tested for viability on NA at 37°C. B. Indicated strains  
187 were subjected to viability assays as described above and grown on NA at 30°C.

Fig. S2

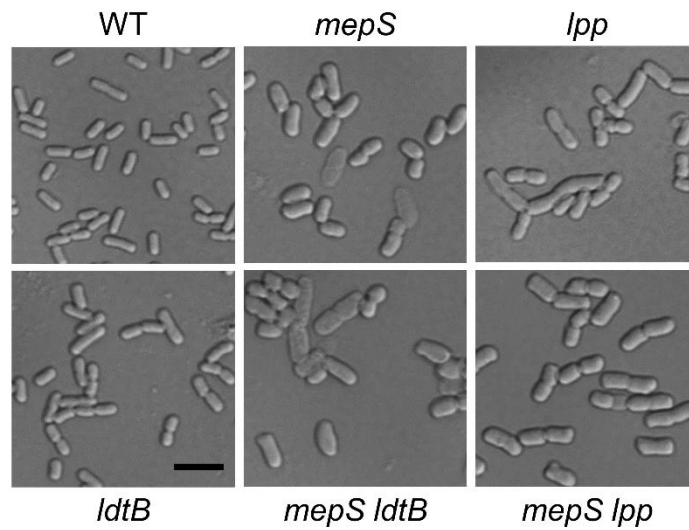

188  
189 **Fig. S2.** Microscopic images of WT and its various mutant derivatives. Indicated strains  
190 were grown overnight and diluted 1:500 into prewarmed Nutrient Broth and grown till  $A_{600}$  of  
191 1.0 at 37°C and visualized with DIC microscopy. The scale bar represents 5  $\mu\text{m}$ .

Fig. S3

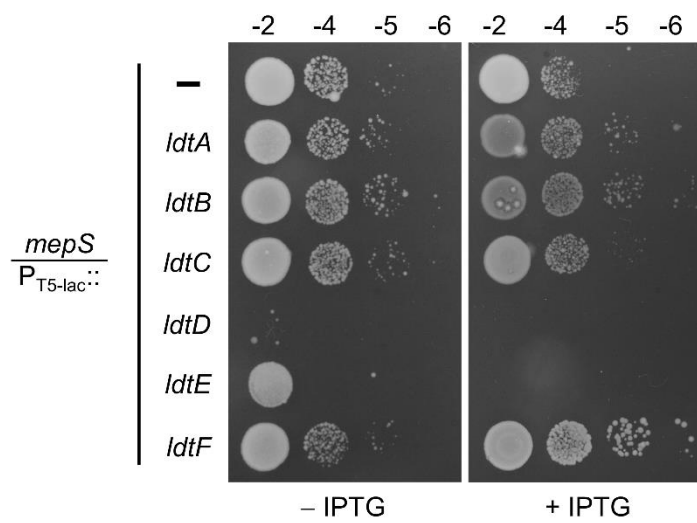

192

193 **Fig. S3.** Effect of overexpression of Ldts on growth of *mepS* mutant.  $\Delta mepS$  mutant carrying

194 either pCA24N vector ( $P_{T5-lac}::$ ) or its derivatives ( $P_{T5-lac}::ldtA-F$ ) were grown and viability

195 was tested on NA plates at 37°C with or without 50  $\mu$ M IPTG.

Fig. S4

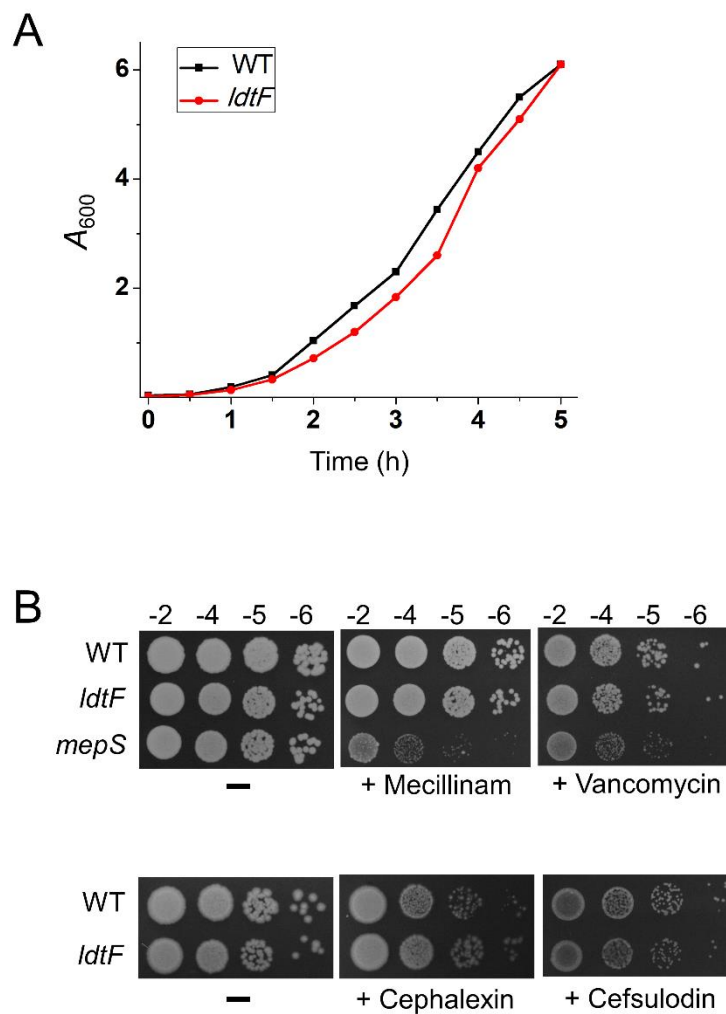

196

197 **Fig. S4.** Phenotypes of  $\Delta ldtF$  mutant. A. Growth curve of WT and *ldtF* mutant. Overnight  
198 grown cultures of WT and *ldtF* were sub-cultured 1:500 into fresh LB and growth was  
199 monitored every 30 min at 37°C. B. WT and its mutant derivatives were tested for sensitivity  
200 towards mecillinam (0.2  $\mu\text{g/ml}$ ), vancomycin (225  $\mu\text{g/ml}$ ), cephalexin (4  $\mu\text{g/ml}$ ) and  
201 cefsulodin (20  $\mu\text{g/ml}$ ) on LB at 37°C.

Fig. S5

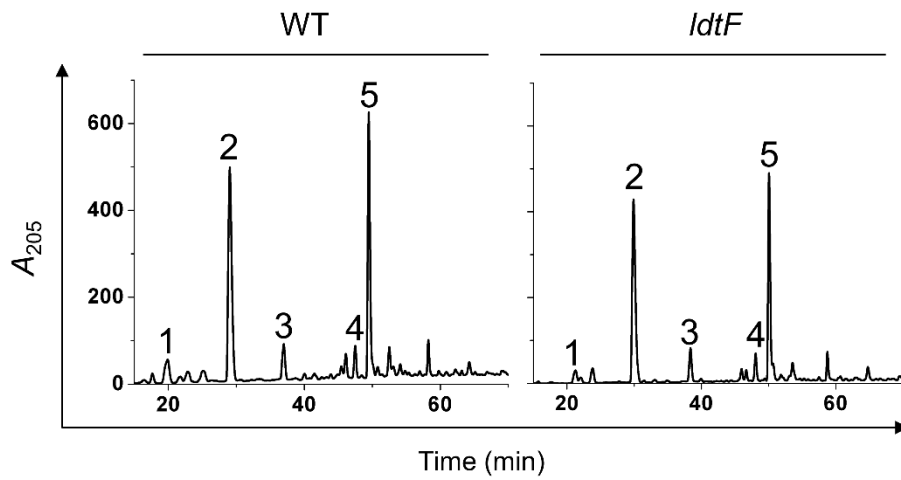

202

203 **Fig. S5.** PG composition of *ldtF* mutant. HPLC chromatograms of PG sacculi isolated from  
204 WT and *ldtF* mutant. Strains were grown to an  $A_{600}$  of  $\sim 1$  in LB followed by isolation and  
205 analysis of PG sacculi. Data shown is representative of three independent experiments. Peak  
206 1- tri, peak 2- tetra, peak 3- tri-lys-arg, peak 4- tri-tetra, peak 5- tetra-tetra.

Fig. S6

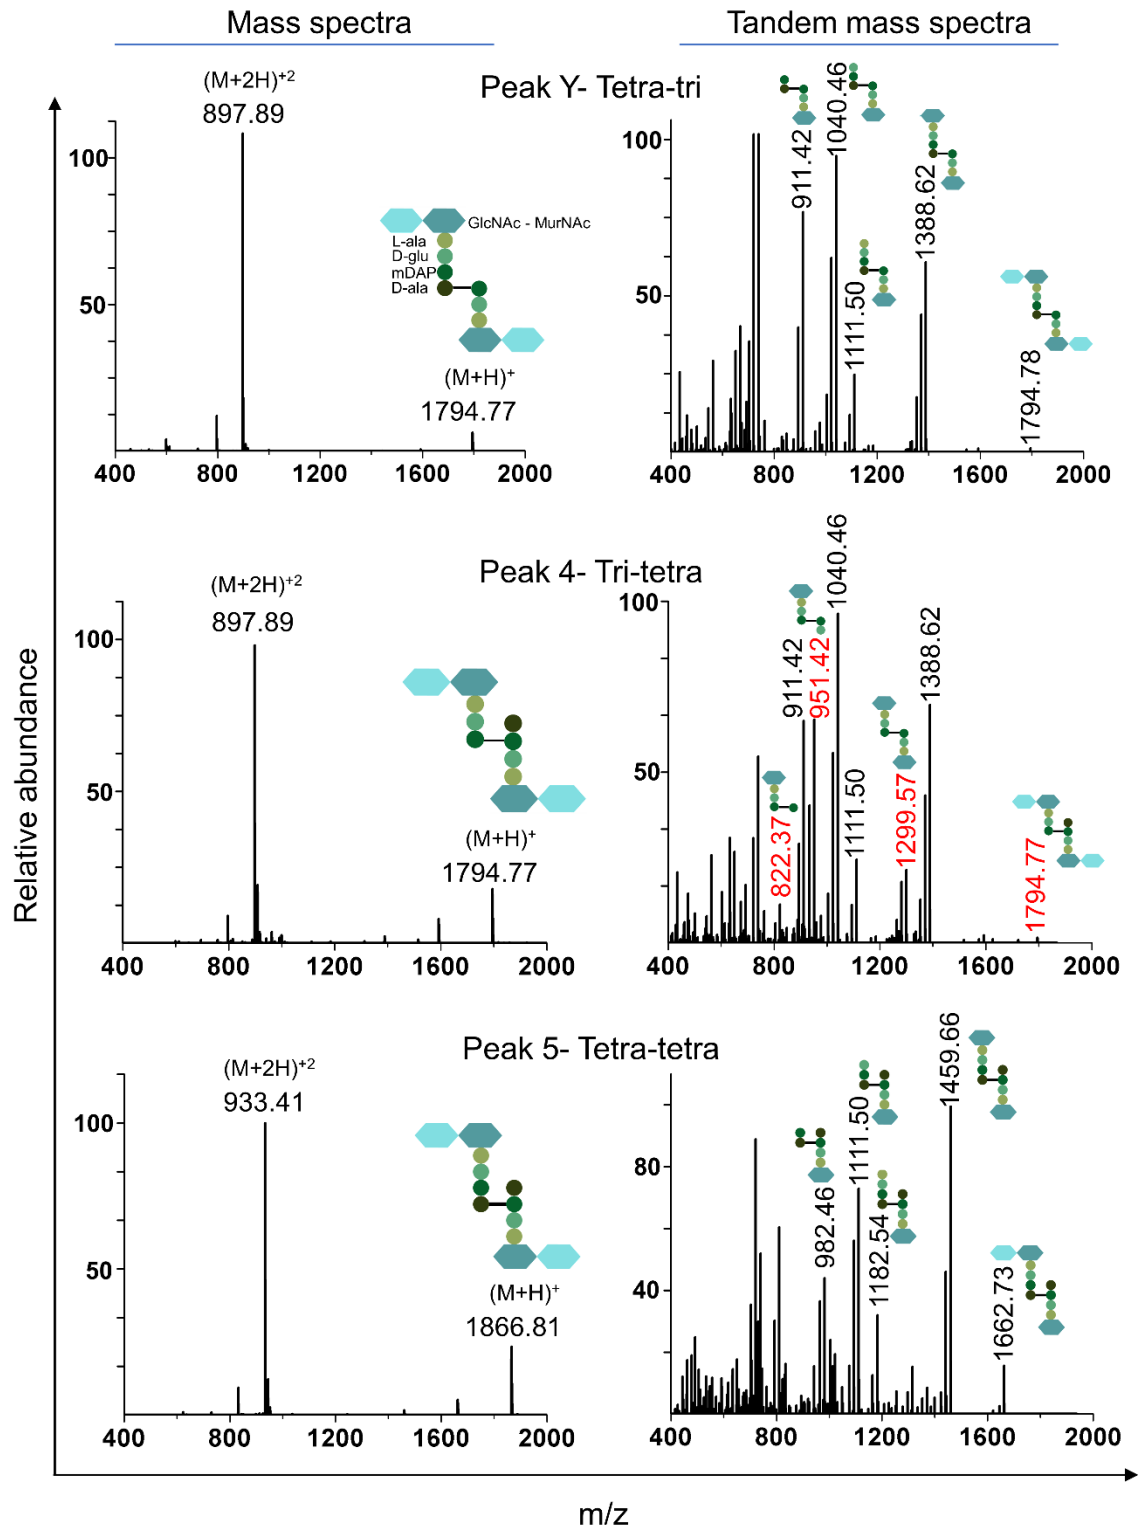

207

208 **Fig. S6.** Mass spectrometry analysis of various mucopeptides including tetra-tri, tri-tetra and

209 tetra-tetra. Mass spectra of various mucopeptides indicating the molecular mass (both +1 and

210 +2 charges) is shown. The signature peaks indicating the 3–3 cross-links in tri-tetra are  
211 highlighted in red.

212



Fig. S7

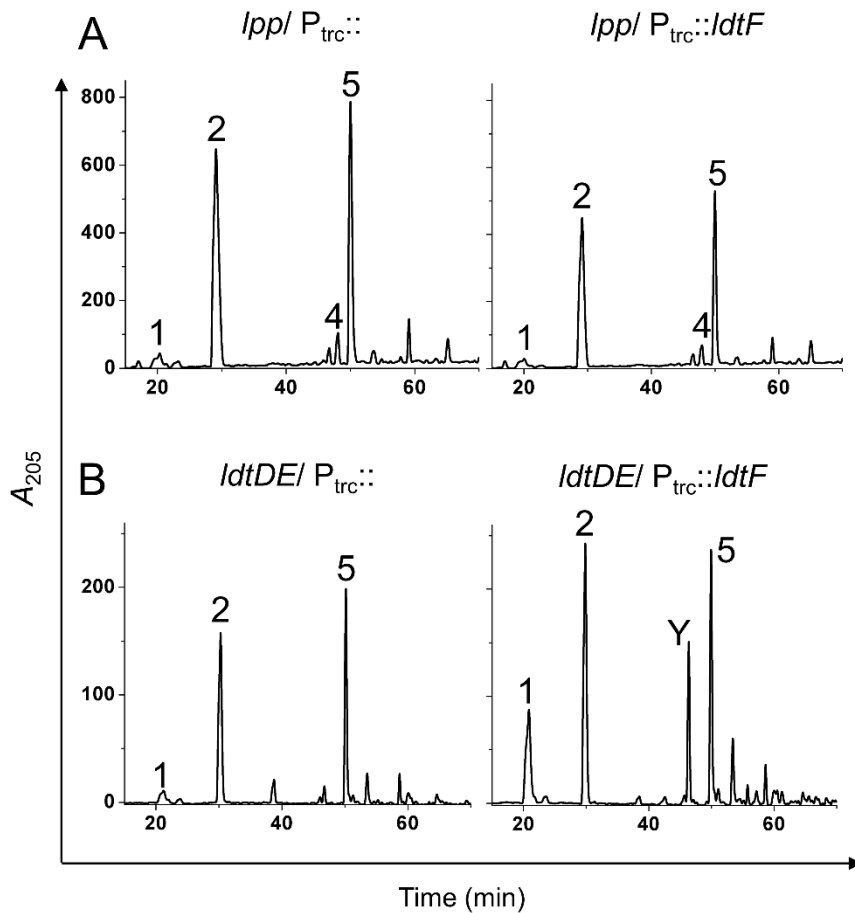

213  
214 **Fig. S7.** PG composition of strains with ectopic expression of LdtF. HPLC chromatograms of  
215 PG sacculi isolated from (A) *lpp* or (B) *ldtDE* deletion mutants carrying either vector  
216 (pTrc99a; P<sub>trc</sub>::) or pRB1(P<sub>trc</sub>::*ldtF*). Strains were grown to an  $A_{600}$  of  $\sim 1$  in LB containing  
217 150  $\mu$ M IPTG followed by isolation and analysis of PG sacculi. Note that in absence of Lpp,  
218 increased LdtF does not alter the PG composition. On the other hand, the effect of LdtF is  
219 independent of LdtD and -E. Peak 1- tri, peak 2- tetra, peak 3- tri-lys-arg, peak Y- tetra-tri (4-  
220 3 crosslink), peak 4- tri-tetra (3-3 crosslink), peak 5- tetra-tetra.

Fig. S8

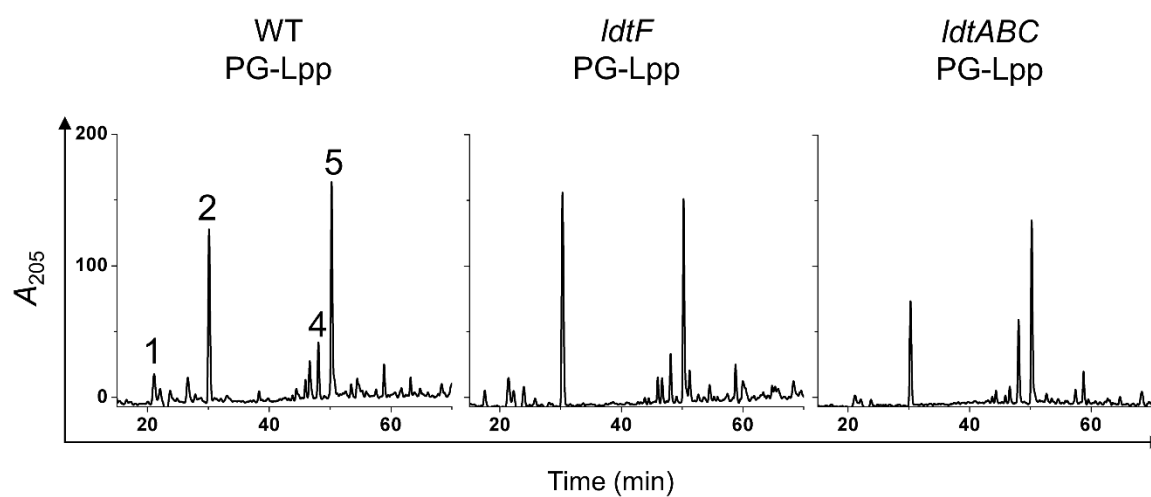

221  
222 **Fig. S8.** HPLC chromatograms of Lpp-bound PG sacculi from WT, *ldtF* and *ldtABC* mutant.  
223 The data obtained from these chromatograms was used to normalize the amount of sample  
224 loaded for performing the experiment described in Fig. 3D. Peak 1- tri, peak 2- tetra, peak 3-  
225 tri-lys-arg, peak 4- tri-tetra, peak 5- tetra-tetra.

Fig. S9

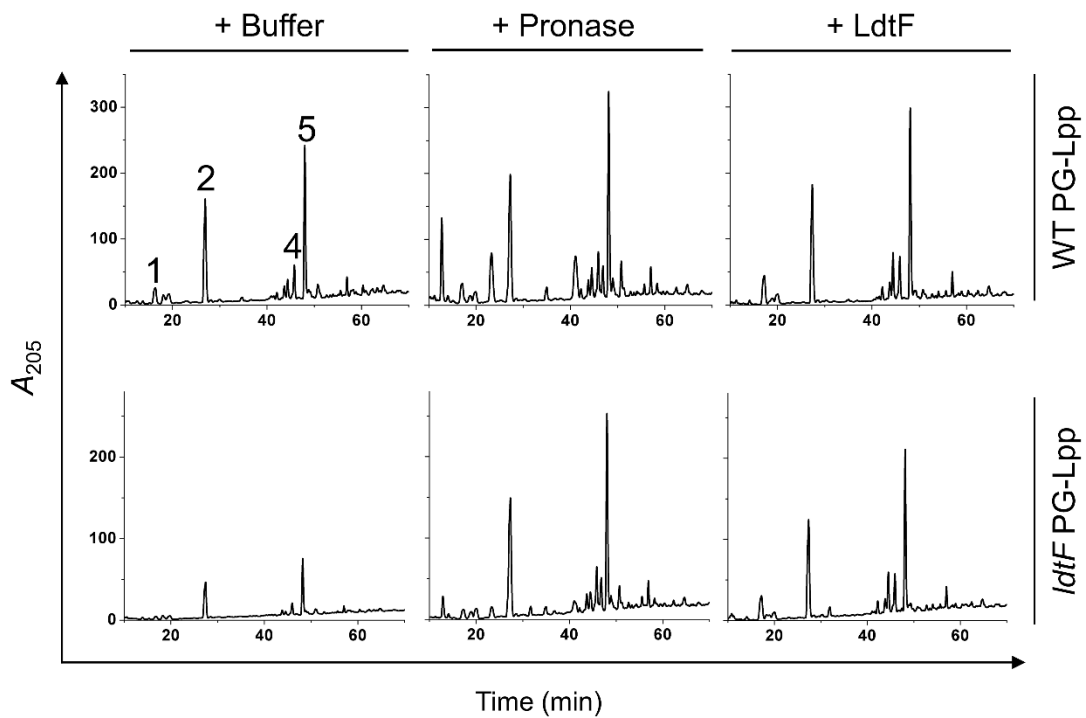

226

227

228

229

230

231

**Fig. S9.** HPLC chromatograms of Lpp-bound PG sacculi from WT and *ldtF* mutant. The PG sacculi were treated either with buffer, pronase (0.2 mg/ml) or LdtF (4  $\mu$ M) for 16 h at 30°C and the remaining insoluble fraction was treated with mutanolysin and separated by HPLC. Note that the tri-lys-arg peak is absent in LdtF-treated PG sacculi. Peak 1- tri, peak 2- tetra, peak 3- tri-lys-arg, peak 4- tri-tetra, peak 5- tetra-tetra.

Fig. S10

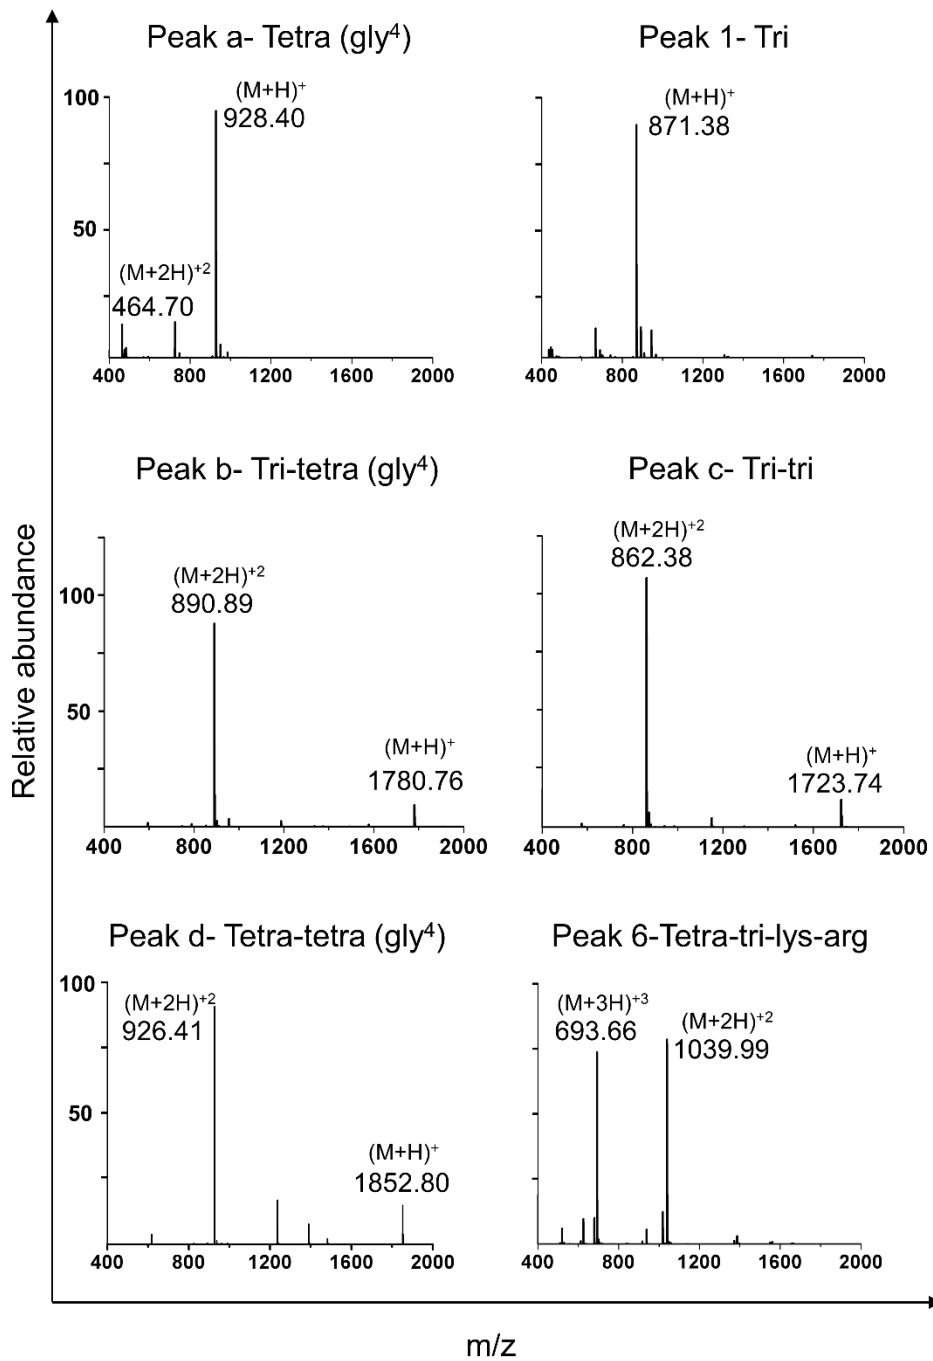

232

233

**Fig. S10.** Identification of muropeptides using Mass spectrometry analysis. Mass spectra of

234

various muropeptides indicating the molecular mass (both +1 and +2 charges) is shown.

Fig. S11

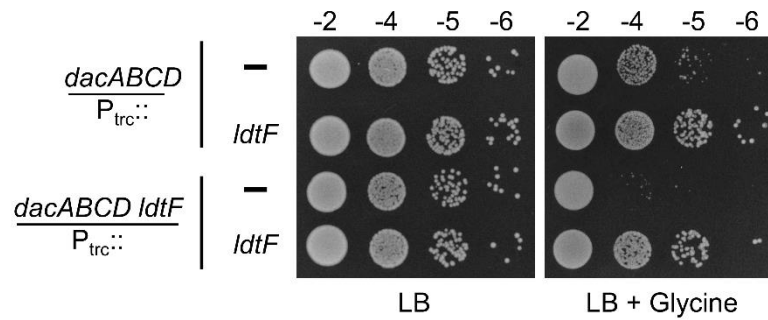

235

236 **Fig. S11.** Effect of LdtF on glycine-toxicity of *dacABCD* mutant. Cultures of *dacABCD* and  
 237 *dacABCD ldtF* mutants carrying either vector (pTrc99a; P<sub>trc::</sub>) or pRB1(P<sub>trc::ldtF</sub>) were  
 238 grown in LB broth, serially diluted, and 5 μL of each dilution were spotted on indicated  
 239 plates and tested for viability at 37°C after 18 h of growth. Glycine and IPTG are used at 25  
 240 mM and 100 μM respectively. *dacABCD* deletion mutant was slow-growing on glycine-  
 241 supplementation and *ldtF* deletion exacerbated the sickness whereas more copies of *ldtF*  
 242 improved the growth of the quadruple mutant.

Fig. S12 A

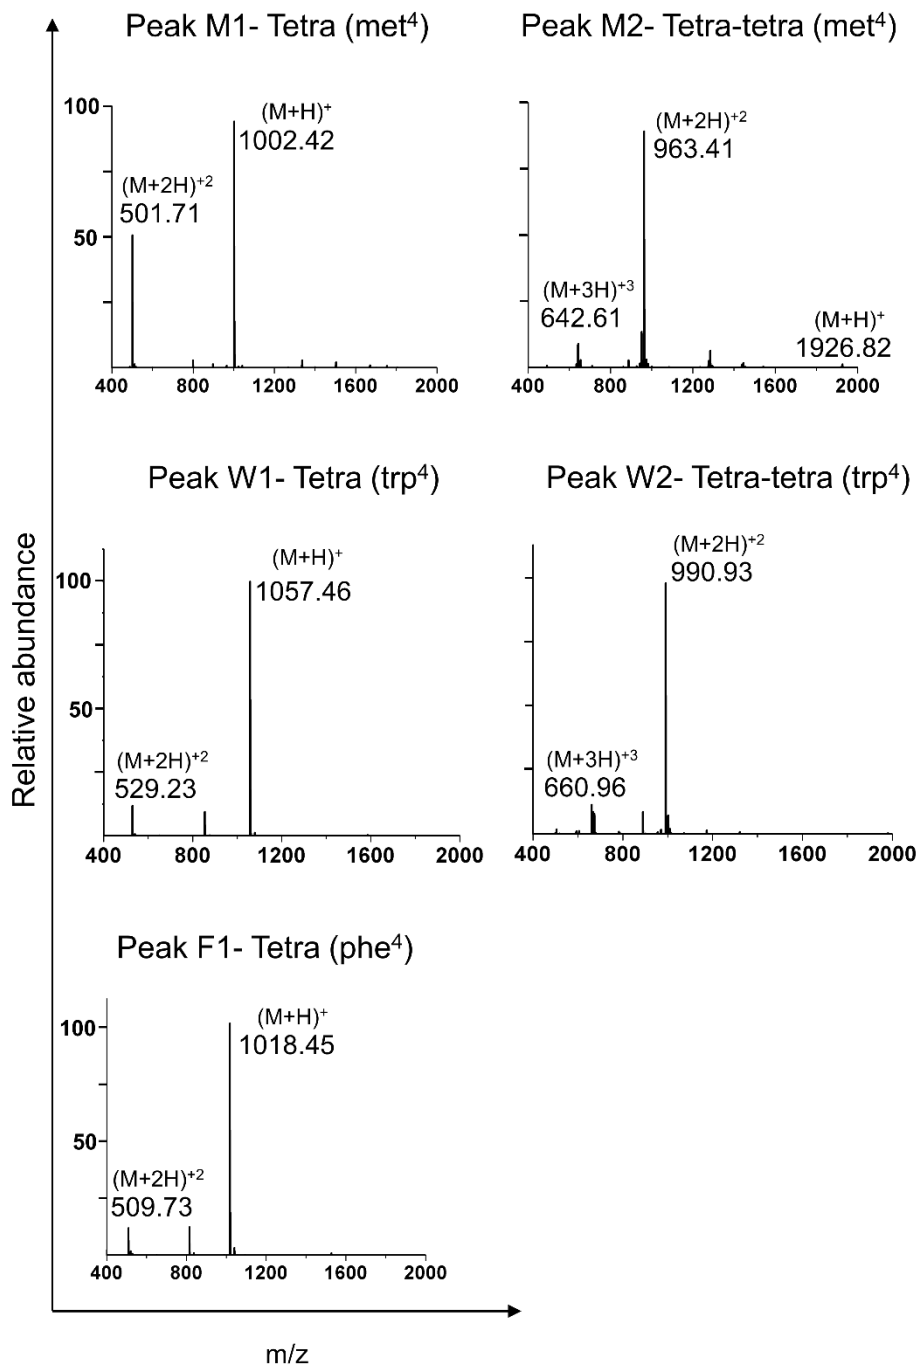

243  
244

Fig. S12 B

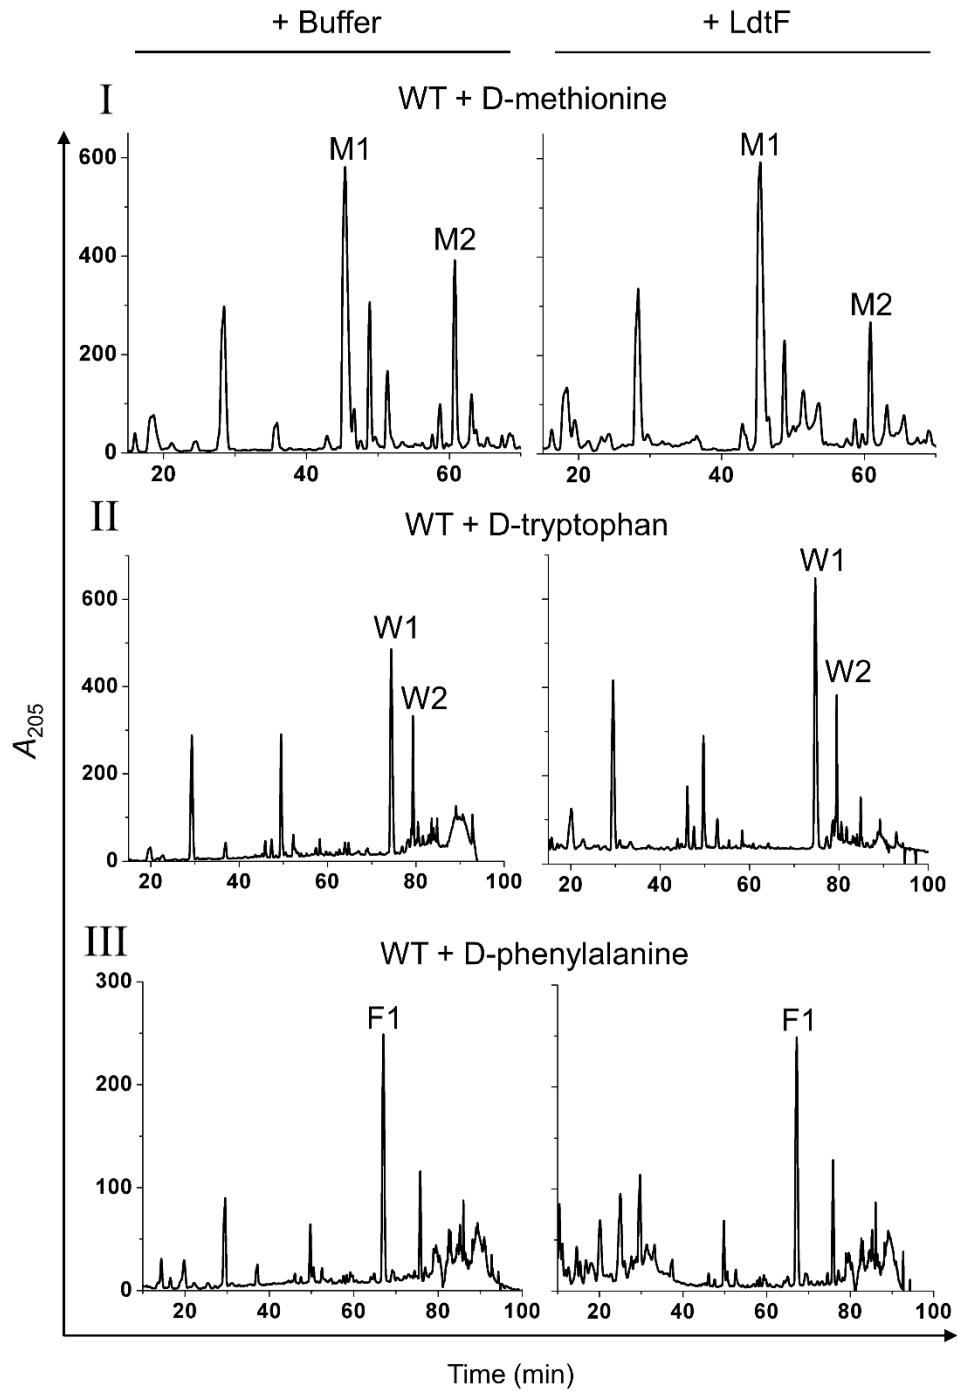

245

246 **Fig. S12.** Effect of LdtF on NCDAAs containing muropeptides. (A) Mass spectrometry

247 analysis of muropeptides containing NCDAAs (D-methionine, D-tryptophan or D-

248 phenylalanine) (B) Treatment of soluble muropeptides from PG sacculi of strains grown in 20

249 mM D-methionine (I), 15 mM D-tryptophan (II), or 15 mM D-phenylalanine (III) were

250 incubated either with buffer or LdtF (4  $\mu$ M) for 16 h and separated by RP-HPLC. LdtF did  
251 not cleave the terminal D-amino acids from any of the NCDAA-muropeptides.



252 **Table S1. Strains used in this study**

| Strains     | Genotype <sup>a</sup>                                                                                     | Source/Reference |
|-------------|-----------------------------------------------------------------------------------------------------------|------------------|
| WT (MG1655) | <i>rph1 ilvG rfb-50</i>                                                                                   | Lab collection   |
| DH5α        | F <sup>-</sup> <i>hsdR17 deoR recA1 endA1phoA supE44 thi-1 gyrA96 relA1 Δ(lac-argF)U169 φ80dlacZ ΔM15</i> | Lab collection   |
| BL21 (λDE3) | <i>ompT rB<sup>-</sup> mB<sup>-</sup> (P<sub>lac</sub>UV5::T7gene1)</i>                                   | Lab collection   |
| DY378       | Recombineering strain; W3110 <i>λcI857 Δ(cro-bioA)</i>                                                    | Lab collection   |
| MR810       | <i>ΔmepS::frt</i>                                                                                         | 6                |
| RB11        | MG1655 <i>ΔldtF::Kan</i> (Keio)                                                                           | This study       |
| RB12        | <i>Δ149ldtF::Kan</i>                                                                                      | This study       |
| RB13        | <i>Δlpp::Kan</i>                                                                                          | This study       |
| RB14        | <i><sup>b</sup>lpp<sup>ΔK58</sup></i>                                                                     | This study       |
| RB15        | <i>ΔldtABC::frt</i>                                                                                       | This study       |
| RB15        | <i>ΔldtDE::frt</i>                                                                                        | This study       |
| RB16        | <i>ΔdacABCD::frt</i>                                                                                      | This study       |
| RB17        | <i>ΔyciB ΔdcrB</i>                                                                                        | This study       |

253

254 <sup>a</sup>Deletion alleles used in this study are sourced from Keio collection (3). The deletion  
255 mutations were used after testing for their authenticity (by linkage analysis, PCR and  
256 sequence analysis) and introduced into different strain backgrounds by P1 phage-mediated  
257 transduction (7). MG1655 was used as the wild type strain. The Kan marker from strains was  
258 flipped out using pCP20 plasmid encoding a Flp recombinase (1). Flipping creates a ‘*frt*’ scar  
259 at the site of deletion.

260 <sup>b</sup>*lpp<sup>K58</sup>* allele is from Thomas Silhavy’s laboratory. It was transferred by P1 transduction  
261 using a 60% linked tetracycline marker.

262

263 **Table S2. Plasmids used in this study**

| Plasmid             | Relevant features                                                   | Source/Reference |
|---------------------|---------------------------------------------------------------------|------------------|
| pET21b              | ColE1, Amp <sup>R</sup> , <i>lacI</i> q, T7 <i>lac</i>              | Lab collection   |
| pTrc99a             | ColE1, Amp <sup>R</sup> , <i>lacI</i> q, P <sub>trc</sub>           | Lab collection   |
| pCA24N              | Cm <sup>R</sup> , <i>lacI</i> q, P <sub>T5-lac</sub>                | 8                |
| pCA24N- <i>ldtA</i> | Cm <sup>R</sup> , <i>lacI</i> q, P <sub>T5-lac</sub> :: <i>ldtA</i> | 8                |
| pCA24N- <i>ldtB</i> | Cm <sup>R</sup> , <i>lacI</i> q, P <sub>T5-lac</sub> :: <i>ldtB</i> | 8                |
| pCA24N- <i>ldtC</i> | Cm <sup>R</sup> , <i>lacI</i> q, P <sub>T5-lac</sub> :: <i>ldtC</i> | 8                |
| pCA24N- <i>ldtD</i> | Cm <sup>R</sup> , <i>lacI</i> q, P <sub>T5-lac</sub> :: <i>ldtD</i> | 8                |
| pCA24N- <i>ldtE</i> | Cm <sup>R</sup> , <i>lacI</i> q, P <sub>T5-lac</sub> :: <i>ldtE</i> | 8                |
| pCA24N- <i>ldtF</i> | Cm <sup>R</sup> , <i>lacI</i> q, P <sub>T5-lac</sub> :: <i>ldtF</i> | 8                |
| pRB1                | pTrc99a- <i>ldtF</i>                                                | This study       |
| pRB2                | pTrc99a- <i>ldtF</i> -H135A                                         | This study       |
| pRB3                | pTrc99a- <i>ldtF</i> -C143A                                         | This study       |
| pRB4                | pET21b- <i>ldtF</i> <sup>20-246</sup>                               | This study       |

264

265 **Table S3. Muropeptide composition of strains carrying multiple copies of *ldtF***

| Muropeptide<br>(Peak) | % Area of muropeptide peaks <sup>a</sup> |                                        |                                                         |                                                         |
|-----------------------|------------------------------------------|----------------------------------------|---------------------------------------------------------|---------------------------------------------------------|
|                       | WT/<br>P <sub>trc</sub> ::               | WT/<br>P <sub>trc</sub> :: <i>ldtF</i> | WT/<br>P <sub>trc</sub> :: <i>ldtF</i> <sub>H135A</sub> | WT/<br>P <sub>trc</sub> :: <i>ldtF</i> <sub>C143A</sub> |
| Tri (1)               | 5.81 ± 0.06                              | 15.74 ± 0.47                           | 9.51 ± 0.47                                             | 8.91 ± 1.41                                             |
| Tetra (2)             | 38.91 ± 0.37                             | 34.19 ± 1.70                           | 35.14 ± 1.42                                            | 37.6 ± 1.47                                             |
| Tri-lys-arg (3)       | <b>4.57 ± 0.53</b>                       | <b>0.7 ± 0.60</b>                      | <b>2.2 ± 1.22</b>                                       | <b>1.86 ± 1.06</b>                                      |
| Tetra-tri (Y)         | <b>3.0 ± 0.23</b>                        | <b>11.75 ± 2.67</b>                    | <b>5.34 ± 0.06</b>                                      | <b>5.27 ± 0.77</b>                                      |
| Tri-tetra (4)         | 3.54 ± 0.35                              | 2.47 ± 0.45                            | 3.99 ± 0.25                                             | 4.87 ± 0.18                                             |
| Tetra-tetra (5)       | 32.22 ± 0.70                             | 25.15 ± 1.79                           | 27.44 ± 2.6                                             | 26.33 ± 2.91                                            |

266

267 <sup>a</sup>Muropeptide analysis was done by calculating the relative percentage area of each  
 268 muropeptide from the HPLC chromatograms.

269

270 **References**

- 271 1. K. A. Datsenko, B. L. Wanner, One-step inactivation of chromosomal genes in  
272 *Escherichia coli* K-12 using PCR products. *Proc. Natl. Acad. Sci. U.S.A.* **97**, 6640–  
273 6645 (2000).
- 274 2. S. Uzzau, N. Figueroa-Bossi, S. Rubino, L. Bossi, Epitope tagging of chromosomal  
275 genes in *Salmonella*. *Proc. Natl. Acad. Sci. U.S.A.* **98**, 15264-15269 (2001).
- 276 3. T. Baba, *et al.*, Construction of *Escherichia coli* K-12 in-frame, single-gene knockout  
277 mutants: the Keio collection. *Mol. Syst. Biol.* **2**:2006.0008 (2006).
- 278 4. B. Glauner, J. V. Höltje, U. Schwarz, The composition of the murein of *Escherichia*  
279 *coli*. *J. Biol. Chem.* **263**, 10088-10095 (1988).
- 280 5. P. K. Chodiseti, M. Reddy, Peptidoglycan hydrolase of an unusual cross-link  
281 cleavage specificity contributes to bacterial cell wall synthesis. *Proc. Natl. Acad. Sci.*  
282 *U.S.A.* **116**, 7825-7830 (2019).
- 283 6. S. K. Singh, L. SaiSree, R. N. Amrutha, M. Reddy, Three redundant murein  
284 endopeptidases catalyse an essential cleavage step in peptidoglycan synthesis of  
285 *Escherichia coli* K12. *Mol. Microbiol.* **86**, 1036-1051 (2012).
- 286 7. J. H. Miller, A Short Course in Bacterial Genetics: A Laboratory Manual and  
287 Handbook for *Escherichia coli* and Related Bacteria (Cold Spring Harbor Lab Press,  
288 Cold Spring Harbor, NY) (1992).
- 289 8. M. Kitagawa, *et al.*, Complete set of ORF clones of *Escherichia coli* ASKA library (a  
290 complete set of *E. coli* K-12 ORF archive): unique resources for biological research.  
291 *DNA Res.* **12**, 291-299 (2005).

292

293
